# Supplementary material for: Catholic Confessions of Sin as Third Party Moral Enforcement
Source: Royal Society of Chemistry journal article supplement (doi:10.1039/d0ra07443h), 2004-01-01
Supplement: d0ra07443h1.pdf [file d0ra07443h1.pdf]

*Electronic Supplementary Information for*

**A Useful Preparation of Ultrasmall Iron Oxide Particles by using Arc Plasma Deposition**

Yumi Ida,<sup>a</sup> Atsushi Okazawa,<sup>b,††</sup> Kazutaka Sonobe,<sup>c</sup> Hisanori Muramatsu,<sup>c</sup> Tetsuya Kambe,<sup>a,c</sup>

Takane Imaoka,<sup>a,c</sup> Wang-Jae Chun,<sup>d</sup> Makoto Tanabe,<sup>a,\*</sup> and Kimihisa Yamamoto<sup>a,c,\*</sup>

<sup>a</sup>*JST-ERATO, Yamamoto Atom Hybrid Project, Tokyo Institute of Technology, Yokohama 226-8503, Japan.*

<sup>b</sup>*Department of Basic Science, Graduate School of Arts and Sciences, The University of Tokyo, Tokyo 153-8902, Japan.*

<sup>c</sup>*Laboratory for Chemistry and Life Science, Tokyo Institute of Technology, Yokohama 226-8503, Japan.*

<sup>d</sup>*Graduate School of Arts and Sciences, International Christian University, Mitaka, Tokyo 181-8585, Japan.*

<sup>††</sup>*Present address: Division of Chemistry, Institute of Liberal Education, Nihon University School of Medicine, Tokyo 173-8610, Japan.*

**Table of Contents:**

|                    |                                                                                                                                                 |     |
|--------------------|-------------------------------------------------------------------------------------------------------------------------------------------------|-----|
| <b>Table S1.</b>   | Ratio of the shot count to the weight of the carbon supports.                                                                                   | S2  |
| <b>Figure S1.</b>  | HAADF-STEM images of KB <sub>400</sub> and KB <sub>800</sub> and its histograms.                                                                | S3  |
| <b>Figure S2.</b>  | HAADF-STEM images of GO <sub>267</sub> and GO <sub>1068</sub> and its histograms.                                                               | S3  |
| <b>Figure S3.</b>  | HAADF-STEM images of GNP <sub>7494</sub> , GNP <sub>10900</sub> , and GNP <sub>18409</sub> and its histograms.                                  | S4  |
| <b>Figure S4.</b>  | HAADF-STEM images of GNP <sub>20000</sub> .                                                                                                     | S4  |
| <b>Figure S5.</b>  | XPS spectra of GNP <sub>3666</sub> , GNP <sub>7494</sub> , GNP <sub>18409</sub> , and GNP <sub>20000</sub> .                                    | S5  |
| <b>Figure S6.</b>  | XPS spectra of KB <sub>200</sub> , GO <sub>534</sub> .                                                                                          | S6  |
| <b>Figure S7.</b>  | The Fe K-edge pre-edge region of XANES in GNP <sub>10900</sub> and $\gamma$ -Fe <sub>2</sub> O <sub>3</sub> .                                   | S7  |
| <b>Figure S8.</b>  | STEM-EELS spectra of GNP <sub>20000</sub> and the standard samples.                                                                             | S8  |
| <b>Figure S9.</b>  | Mössbauer spectra of GNP <sub>3666</sub> and GNP <sub>20000</sub><br>in the temperature range between 300 and 10 K.                             | S8  |
| <b>Table S2.</b>   | Obtained parameters of <sup>57</sup> Fe Mössbauer spectra measured<br>for GNP <sub>3666</sub> , GNP <sub>10900</sub> and GNP <sub>20000</sub> . | S9  |
| <b>Figure S10.</b> | Plots of the $M_s$ and $H_c$ of the GNP <sub>nn</sub> series against the Fe wt%.                                                                | S10 |
| <b>Figure S11.</b> | Temperature dependent magnetization of the GNP <sub>nn</sub> series.                                                                            | S10 |
| <b>Figure S12.</b> | Fundamental properties of Fe <sub>60</sub> with a fourth generation<br>dendritic phenylazomethine template (DPA G4).                            | S11 |

**Table S1.** Ratio of the shot count to the weight of the carbon supports.

| <b>Sample</b>        | <b>Shot count</b> | <b>Weight /g</b> | <b>Ratio (Shot count/g)</b> |
|----------------------|-------------------|------------------|-----------------------------|
| KB <sub>200</sub>    | 200               | 0.09815          | 2038                        |
| KB <sub>400</sub>    | 400               | 0.09212          | 4342                        |
| KB <sub>800</sub>    | 800               | 0.1001           | 7992                        |
| KB <sub>2000</sub>   | 20000             | 0.09521          | 21006                       |
| GO <sub>134</sub>    | 134               | 0.3312           | 405                         |
| GO <sub>267</sub>    | 267               | 0.318            | 840                         |
| GO <sub>534</sub>    | 534               | 0.326            | 1638                        |
| GO <sub>1068</sub>   | 1068              | 0.3146           | 3395                        |
| GNP <sub>3666</sub>  | 3666              | 2.26             | 1622                        |
| GNP <sub>7494</sub>  | 7494              | 2.31             | 3244                        |
| GNP <sub>10900</sub> | 10900             | 2.55             | 4275                        |
| GNP <sub>18409</sub> | 18409             | 2.44             | 7545                        |

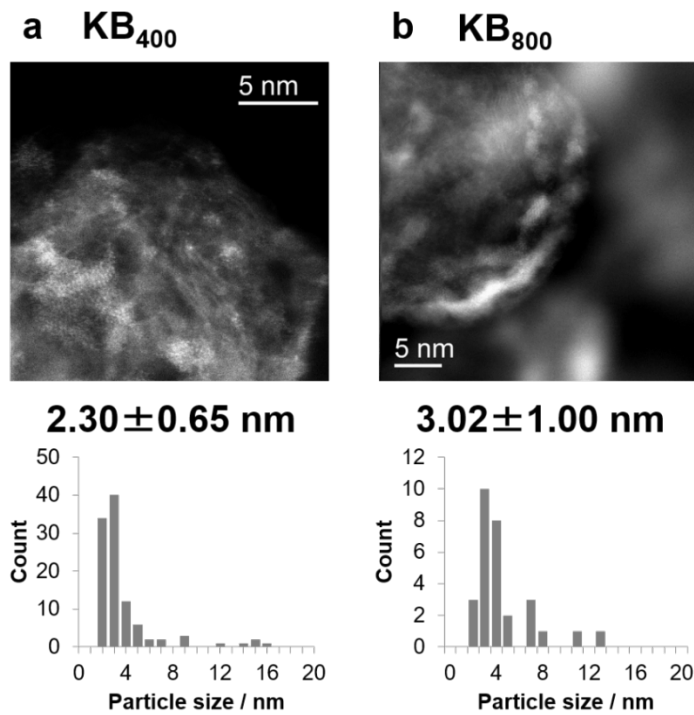

**Figure S1.** HAADF-STEM images and particle size distribution histograms of a)  $\text{KB}_{400}$  and b)  $\text{KB}_{800}$ .

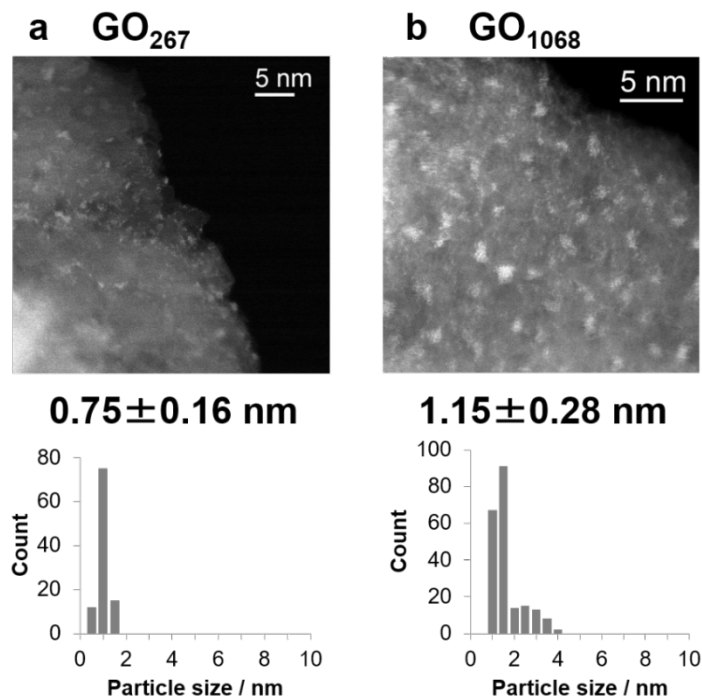

**Figure S2.** HAADF-STEM images and particle size distribution histograms of a)  $\text{GO}_{267}$  and b)  $\text{GO}_{1068}$ .

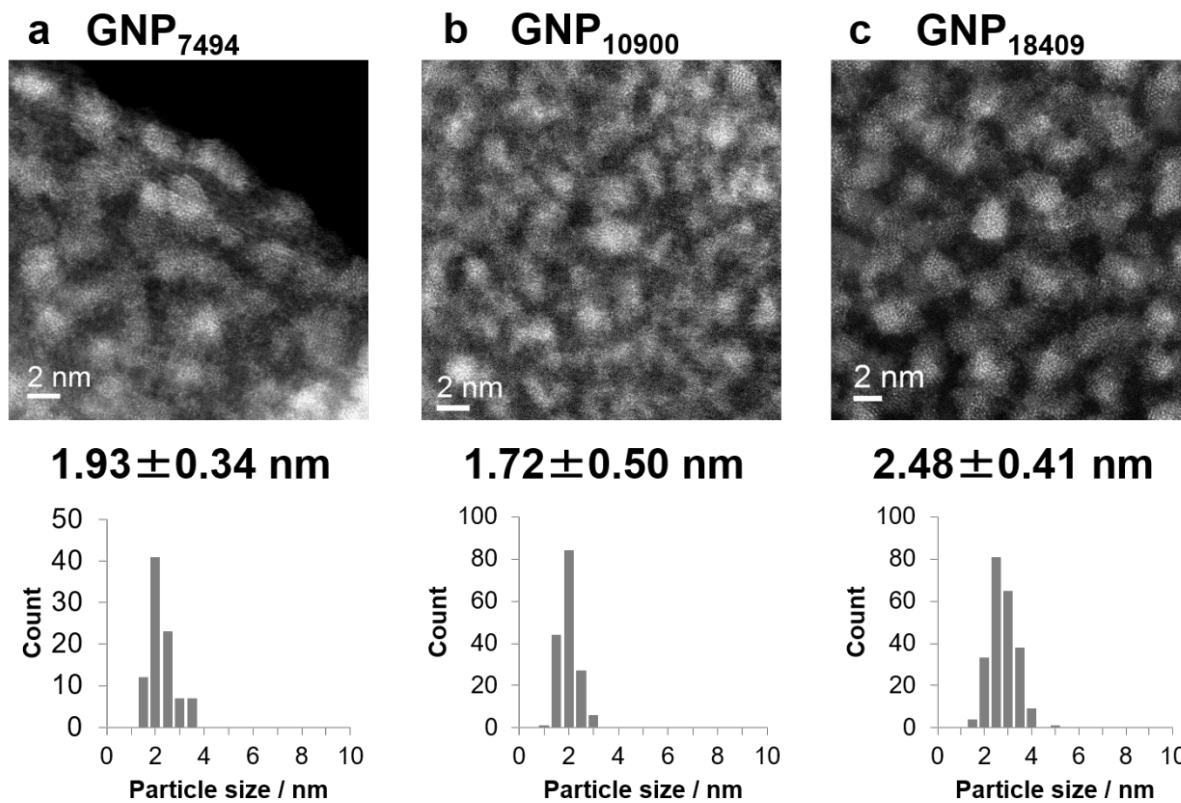

**Figure S3.** HAADF-STEM images and particle size distribution histograms of a) GNP<sub>7494</sub>, b) GNP<sub>10900</sub>, and c) GNP<sub>18409</sub>.

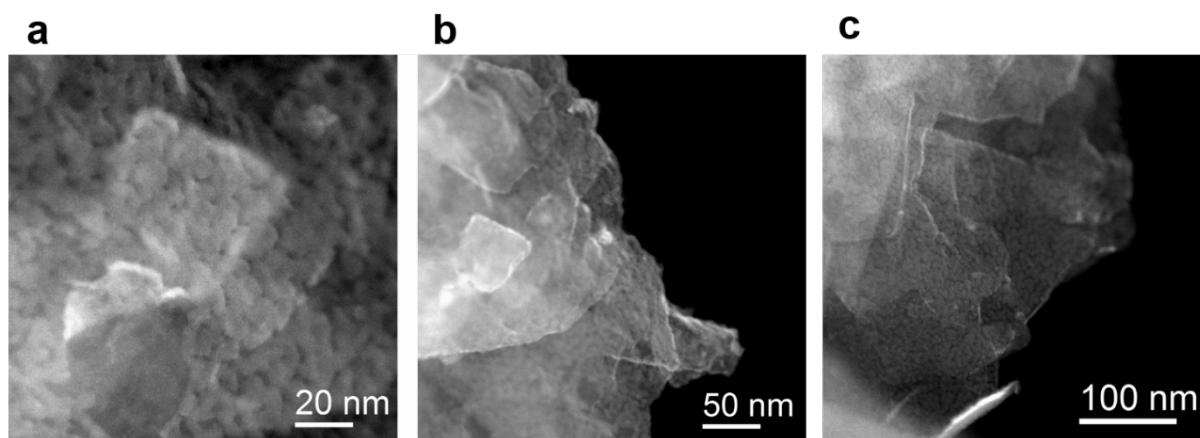

**Figure S4.** HAADF-STEM images of GNP<sub>20000</sub> with three different scale bars; a) 20 nm, b) 50 nm, and c) 100 nm.

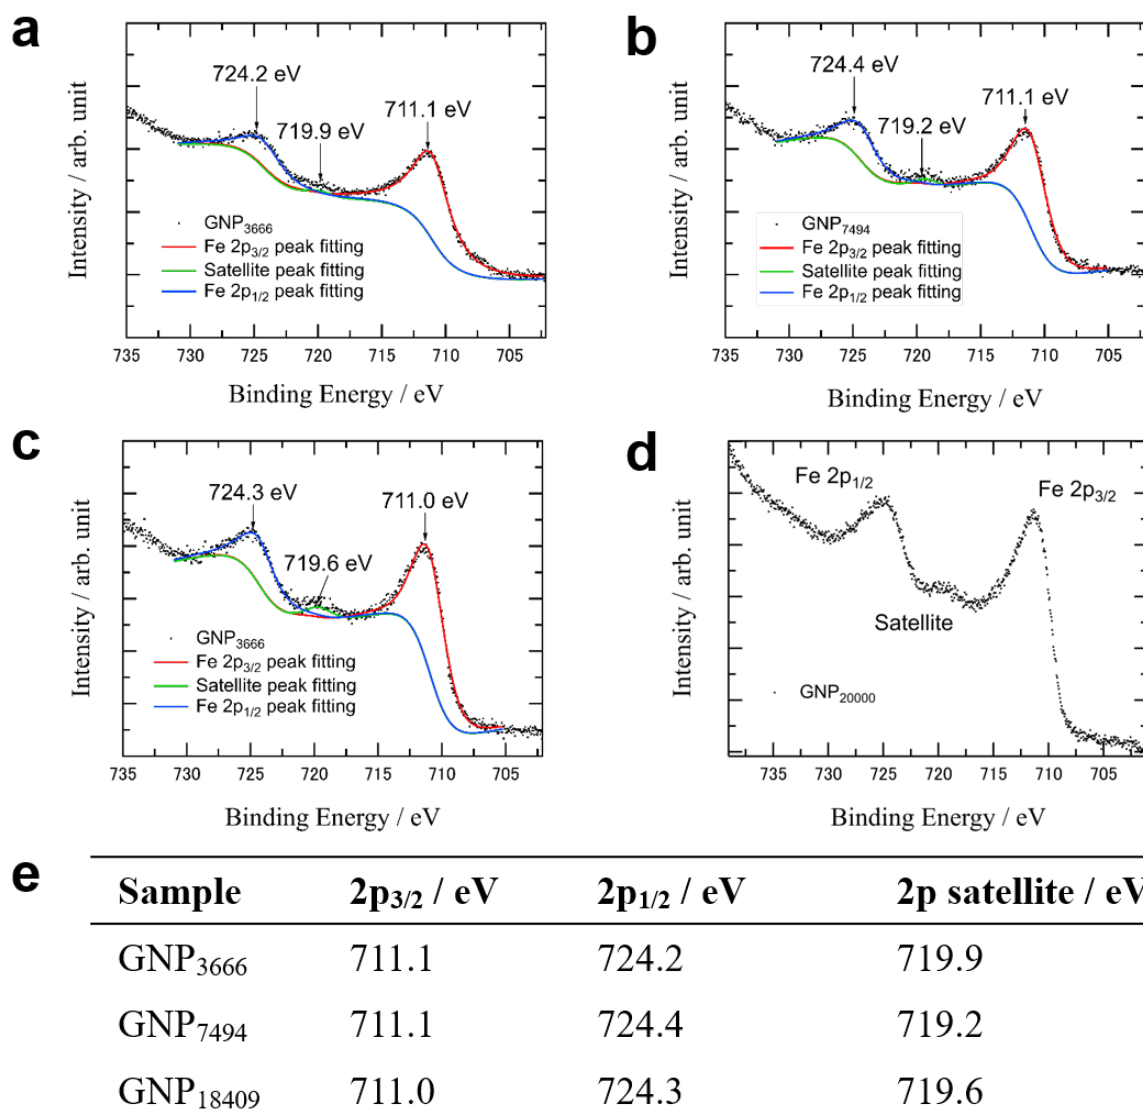

**Figure S5.** XPS spectra of a) GNP<sub>3666</sub>, b) GNP<sub>7494</sub>, and c) GNP<sub>18409</sub>. d) Multiple components of Fe 2p<sub>3/2</sub> in GNP<sub>20000</sub> were assigned as 710.11, 710.82, 711.87 and 713.21 eV. e) Summary of the binding energy parameters of GNP<sub>7494</sub>, GNP<sub>10900</sub>, and GNP<sub>18409</sub> at the peak top.

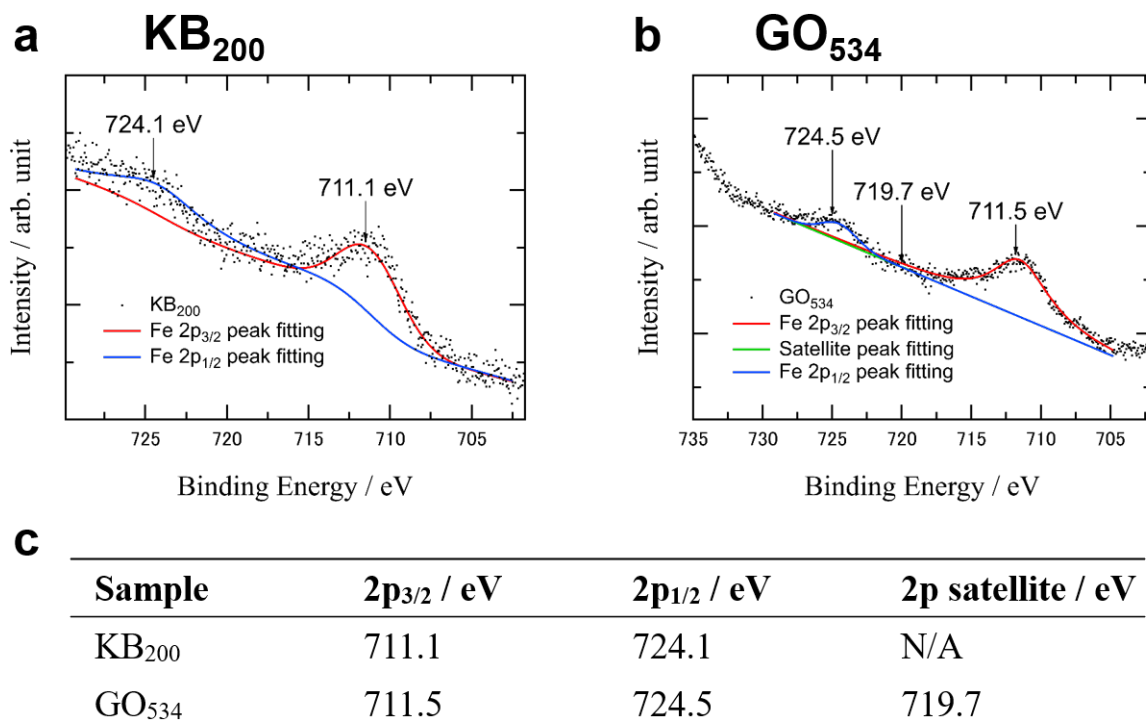

**Figure S6.** XPS analysis of a) KB<sub>200</sub> and b) GO<sub>534</sub>. c) Summary of the binding energy of KB<sub>200</sub> and GO<sub>534</sub> at the peak top.

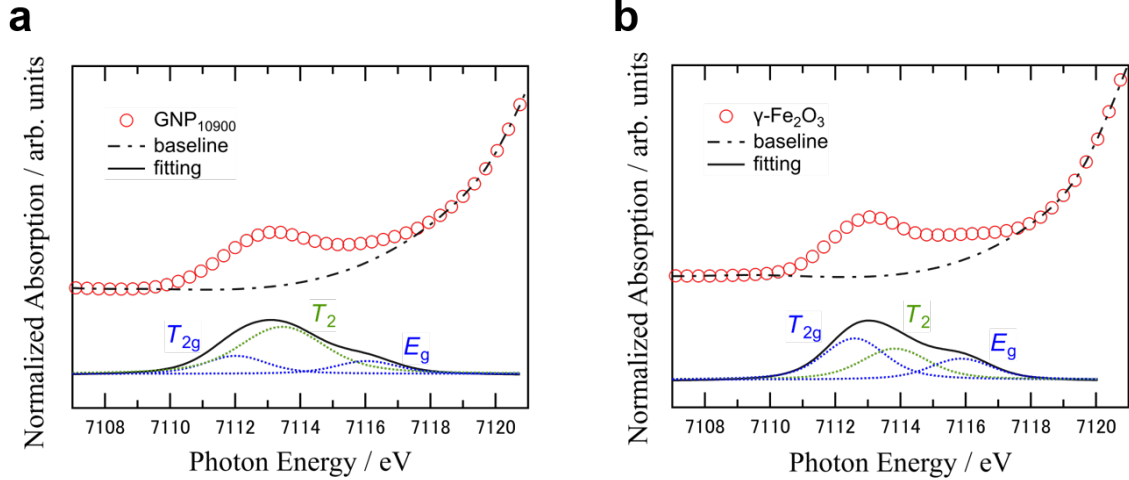

**c**

| Sample                                   | $T_{2g}$         |                |                 | $T_2$            |                |                 | $E_g$            |                |                 | Ratio of $T_g/O_h$ |
|------------------------------------------|------------------|----------------|-----------------|------------------|----------------|-----------------|------------------|----------------|-----------------|--------------------|
|                                          | Peak energy (eV) | Peak intensity | Integrated area | Peak energy (eV) | Peak intensity | Integrated area | Peak energy (eV) | Peak intensity | Integrated area |                    |
| GNP <sub>10900</sub>                     | 7112.0           | 0.010497       | 0.030           | 7113.4           | 0.027491       | 0.107           | 7116.0           | 0.0074473      | 0.021           | 0.67               |
| $\gamma$ -Fe <sub>2</sub> O <sub>3</sub> | 7112.6           | 0.044553       | 0.128           | 7113.8           | 0.033482       | 0.104           | 7115.9           | 0.0226520      | 0.065           | 0.35               |

**Figure S7.** The Fe K-edge pre-edge region of a) GNP<sub>10900</sub> and b)  $\gamma$ -Fe<sub>2</sub>O<sub>3</sub>. These figures display the experimental data (red circles), the baseline, i.e. background function (broken line), a fitting curve to the data (black solid line), and the individual pre-edge peaks for  $T_{2g}$ ,  $E_g$  (blue dotted lines), and  $T_2$  (green dotted line). The fixed FWHM (full width at half maximum) of GNP<sub>10900</sub> and  $\gamma$ -Fe<sub>2</sub>O<sub>3</sub> are as follows. The FWHM values of identical  $T_{2g}$  and  $E_g$  are 2.242 for GNP<sub>10900</sub> and 2.242 for  $\gamma$ -Fe<sub>2</sub>O<sub>3</sub>, that of  $T_2$  is 3.052 for GNP<sub>10900</sub> and 2.414 for  $\gamma$ -Fe<sub>2</sub>O<sub>3</sub>. c) List of the obtained parameters of a) and b).

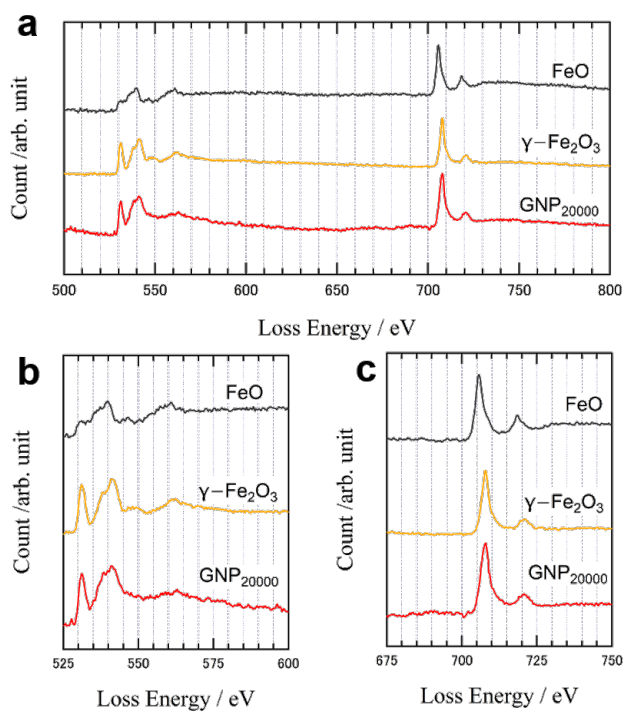

**Figure S8.** a) STEM-EELS spectra of GNP<sub>20000</sub> and the standard samples of FeO and  $\gamma$ -Fe<sub>2</sub>O<sub>3</sub> for references. The spectra of b) O K-edge and c) Fe L<sub>2,3</sub>-edge.

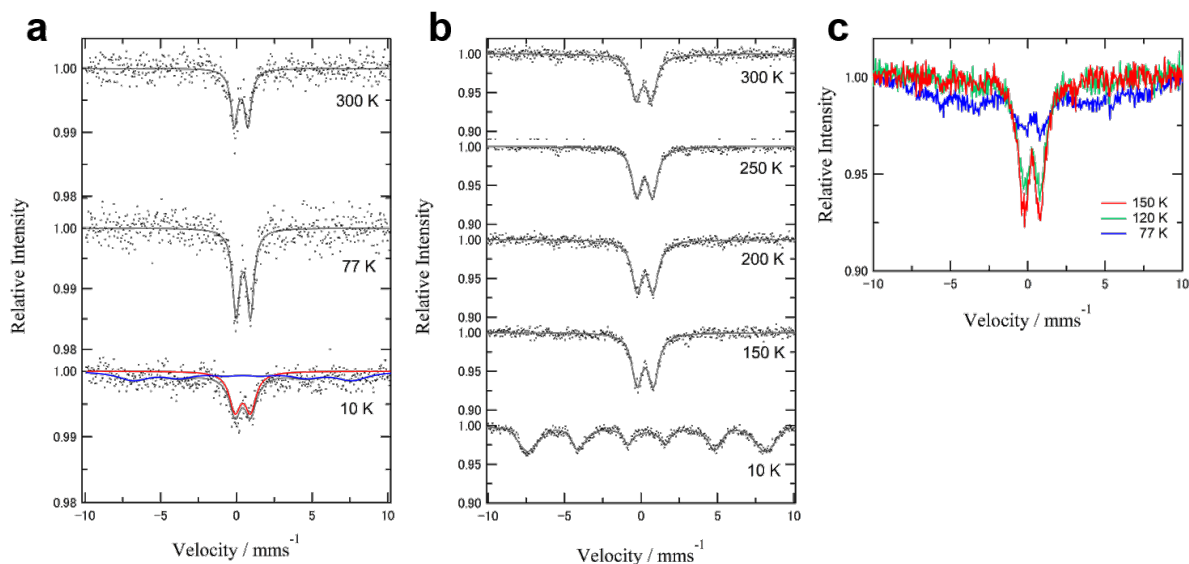

**Figure S9.** Mössbauer spectra of a) GNP<sub>3666</sub> and b,c) GNP<sub>20000</sub> in the temperature range between 300 and 10 K. a) The spectrum of GNP<sub>3666</sub> at 10 K contained a paramagnetic (red) and a magnetic (blue) components. b) The spectrum of GNP<sub>20000</sub> at 10 K existed only the magnetic component, and the overlaid spectrum of the temperature change of c) suggests that a magnetic transition temperature exists between 120 and 150 K.



**Table S2.** Obtained parameters of  $^{57}\text{Fe}$  Mössbauer spectra measured for GNP<sub>3666</sub>, GNP<sub>10900</sub>, and GNP<sub>20000</sub>.

| Sample               | Temp (K) | Paramagnetic (doublet) |             |             |               | Magnetic (sextet) |             |           |                      |           |
|----------------------|----------|------------------------|-------------|-------------|---------------|-------------------|-------------|-----------|----------------------|-----------|
|                      |          | Fraction               | IS (mm/s)   | QS (mm/s)   | LW (mm/s)     | Fraction          | IS (mm/s)   | QS (mm/s) | H <sub>int</sub> (T) | LW (mm/s) |
| GNP <sub>3666</sub>  | 300      | 100%                   | 0.309±0.014 | 0.90±0.02   | 0.56±0.04     |                   |             |           |                      |           |
|                      | 10       | 43.8%                  | 0.42±0.02   | 1.02±0.04   | 0.90±0.07     | 56.2%             | 0.42±0.02   | 0         | 45.0±1.2             | 2.5±0.7   |
| GNP <sub>10900</sub> | 300      | 100%                   | 0.346±0.009 | 0.850±0.015 | 0.60±0.02     |                   |             |           |                      |           |
|                      | 10       | 14.5%                  | 0.494±0.017 | 0.79±0.04   | 0.6682±0.0017 | 85.5%             | 0.494±0.017 | 0         | 40.08 (avg)          | 0.68±0.09 |
| GNP <sub>20000</sub> | 300      | 100%                   | 0.180±0.008 | 1.012±0.013 | 0.81±0.02     |                   |             |           |                      |           |
|                      | 250      | 100%                   | 0.231±0.005 | 1.038±0.009 | 0.779±0.015   |                   |             |           |                      |           |
|                      | 200      | 100%                   | 0.267±0.007 | 1.063±0.011 | 0.818±0.018   |                   |             |           |                      |           |
|                      | 150      | 100%                   | 0.268±0.006 | 1.072±0.011 | 0.818±0.017   |                   |             |           |                      |           |
|                      | 10       |                        |             |             |               | 100.0%            | 0.364±0.007 | 0         | 44.4 (avg)           | 0.64±0.04 |

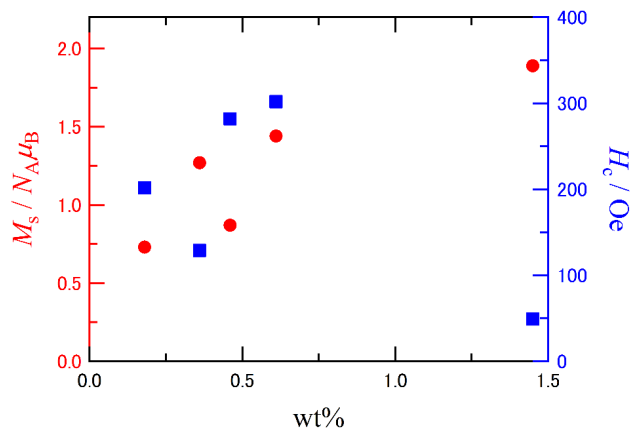

**Figure S10.** Plots of the saturation magnetization ( $M_s$ ) and coercivity ( $H_c$ ) of the  $\text{GNP}_{mn}$  series against the Fe loading weight (wt%).

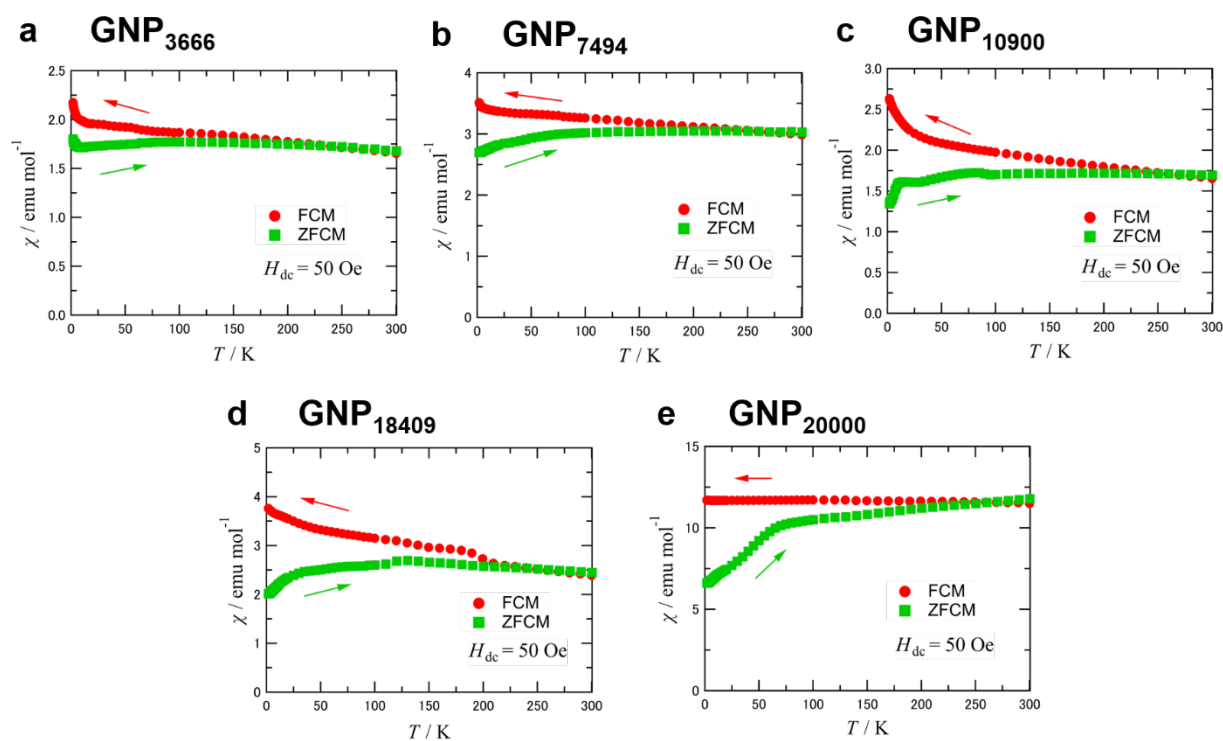

**Figure S11.** Temperature dependent magnetization of a)  $\text{GNP}_{3666}$ , b)  $\text{GNP}_{7494}$ , c)  $\text{GNP}_{10900}$ , d)  $\text{GNP}_{18409}$  and d)  $\text{GNP}_{20000}$ . The red filled circle and green filled square denote field-cooled (FCM) and zero-field-cooled (ZFCM) magnetization, respectively.

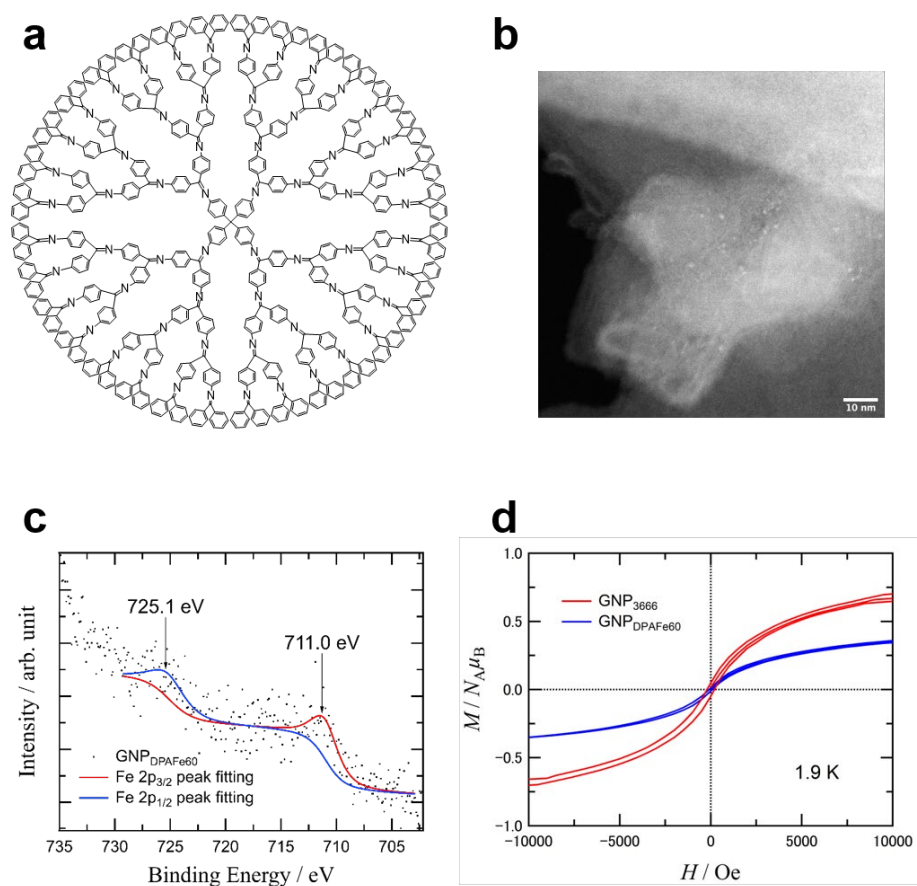

**Figure S12.** a) Molecular structure of a fourth generation dendritic phenylazomethine template (DPA G4). b) A HAADF-STEM image of GNP<sub>Fe60</sub> (Particle size = 1.4 nm). c) XPS spectrum of GNP<sub>Fe60</sub>. d) Magnetization curves of GNP<sub>Fe60</sub> (blue: 0.41 μ<sub>B</sub>) and GNP<sub>3666</sub> (red: 0.73 μ<sub>B</sub>) measured at 1.9 K.
